# Supplementary material
Source: PubMed Central journal article supplement (PMC6240319)
Supplement: develop-145-167379-s1.pdf [file develop-145-167379-s1.pdf]

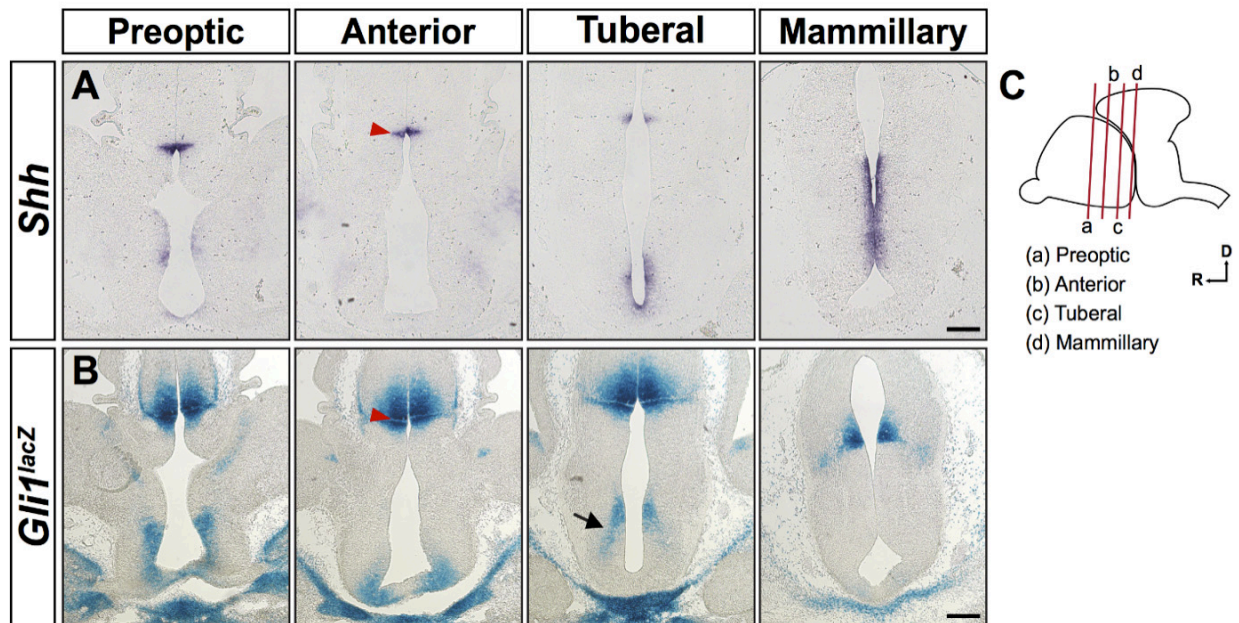

**Figure S1. Persistence of *Shh* signaling during peak periods of hypothalamic neurogenesis.** Coronal sections through the hypothalamus of (A) wild type and (B) *Gli1<sup>lacZ</sup>* embryos at E12.5. (A) RNA *in situ* hybridization detects *Shh* expression along the rostrocaudal axis of the hypothalamus. Weak *Shh* expression is detected in the ventral midline at preoptic and anterior hypothalamic regions. *Shh* expression is maintained in hypothalamic progenitors adjacent to the ventral midline in tuberal and mammillary regions. *Shh* is also observed in the zona limitans intrathalamica (red arrowhead) in the caudal diencephalon. (B) X-gal staining of *Gli1<sup>lacZ</sup>* embryos along the rostrocaudal axis of the hypothalamus. X-gal staining is detected adjacent to *Shh* expressing domains throughout the hypothalamus. At the level of the tuberal hypothalamus, X-gal staining marks progenitors of the DMH and a population of cells that stream ventrally towards the VMH (arrows). Scale bars: 200  $\mu$ m.

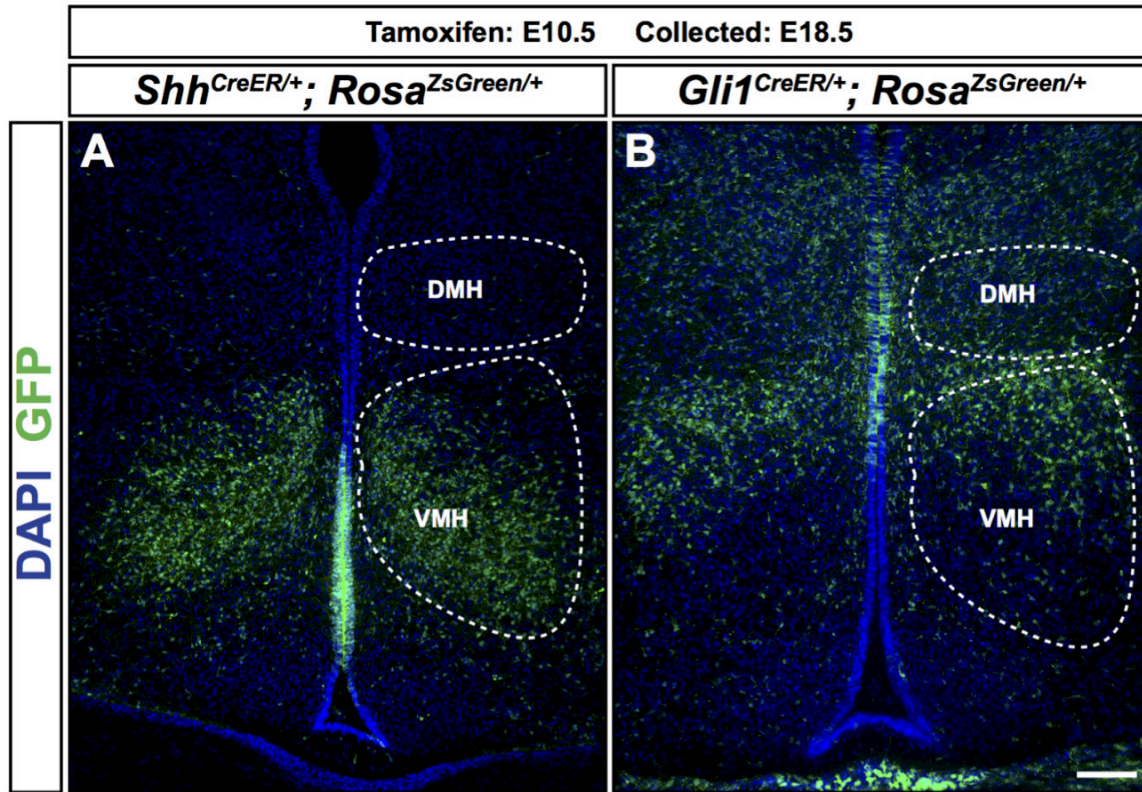

**Figure S2. *Shh* and *Gli1* lineages occupy distinct regions of the VMH.** Coronal sections through the tuberal hypothalamus of (A) *Shh*<sup>CreER/+</sup>; *Rosa*<sup>ZsGreen/+</sup> and (B) *Gli1*<sup>CreER/+</sup>; *Rosa*<sup>ZsGreen/+</sup> embryos at E18.5 that received tamoxifen at E10.5. GFP (ZsGreen) fluorescence is shown on sections counterstained with DAPI. (A) Cells that expressed *Shh* at E10.5 contribute to the ventral and central regions of the VMH at E18.5. (B) Cells that expressed *Gli1* at E10.5 contribute to the DMH and dorsal region of the VMH at E18.5. Scale bar: 100  $\mu$ m. White dashed lines outline tuberal hypothalamic nuclei.

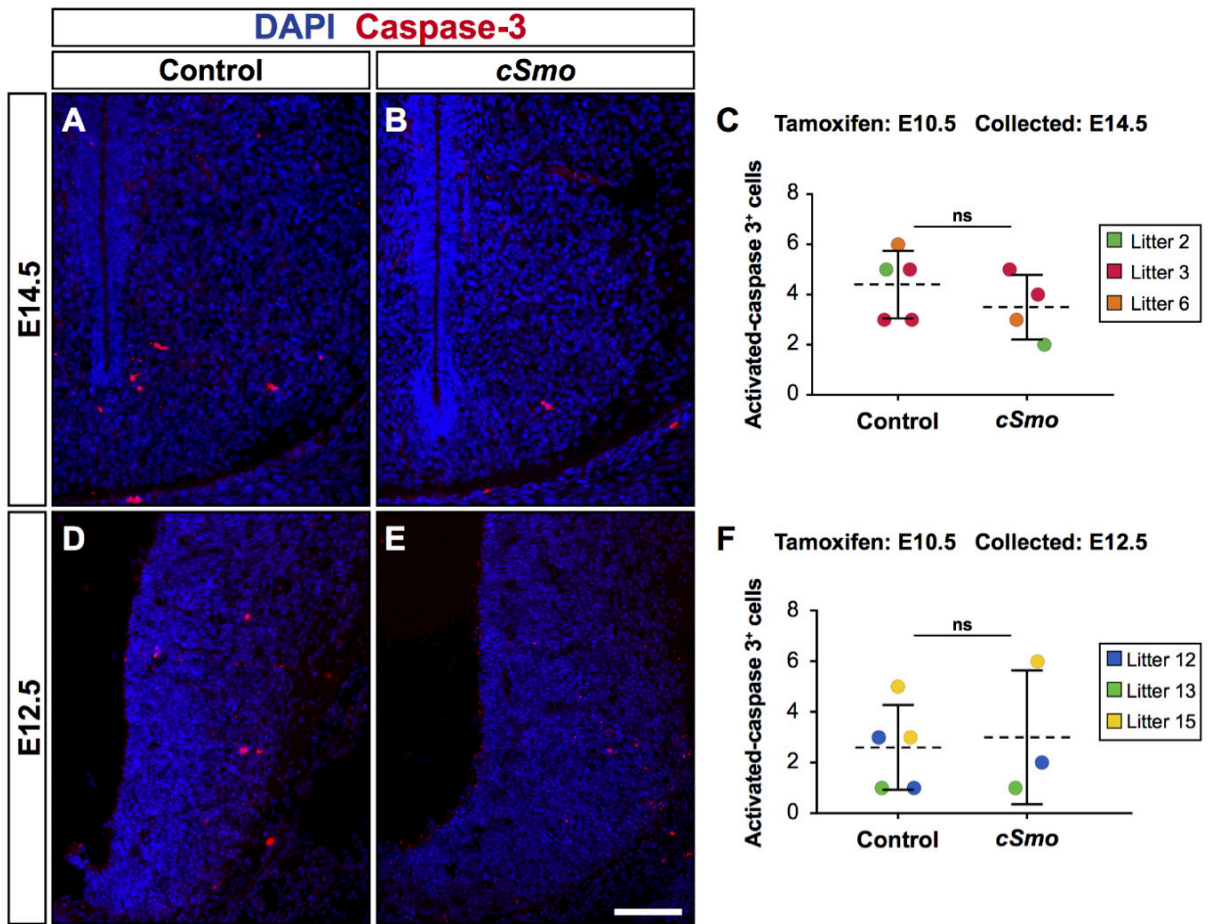

**Figure S3. No difference in cell death between control and *cSmo* embryos.** Coronal sections of control and *cSmo* embryos that received tamoxifen at E10.5 immunostained for activated caspase-3 and counterstained with DAPI. (A-C) No difference in apoptosis between control and *cSmo* embryos is observed at E14.5 (control  $n=5$ ,  $4.4 \pm 1.3$ ; *cSmo*  $n=4$ ,  $3.5 \pm 1.3$ ;  $p>0.05$ ). (D-F) No difference in apoptosis between control and *cSmo* embryos is observed at E12.5 (control  $n=5$ ,  $2.6 \pm 1.7$ ; *cSmo*  $n=3$ ,  $3.0 \pm 2.6$ ;  $p>0.05$ ). Each data point represents the number of cells expressing a given marker on a single section at equivalent levels of the tuberal hypothalamus from a single embryo color-coded by litter ( $n$ =number of embryos analyzed). Scale bars:100  $\mu$ m. Statistical analysis was performed using a two-tailed unpaired *t*-test

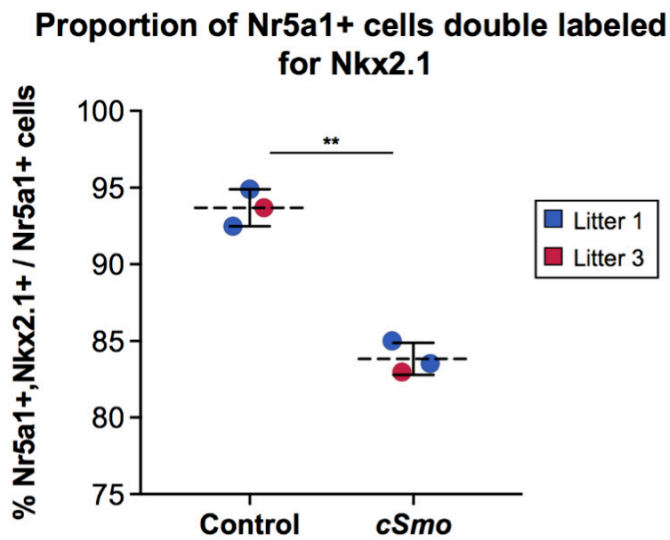

**Figure S4. Fewer Nr5a1 expressing neurons co-label with Nkx2.1 in *cSmo* embryos.**

Quantification of Nr5a1 positive cells on a hemi-section double labeled for Nkx2.1 displayed as the proportion of Nr5a1, Nkx2.1 double positive cells over the total number of Nr5a1 positive cells (control n=3, 93.7%  $\pm$  0.7; *cSmo* n=3, 83.8%  $\pm$  0.6; \*\*p=0.0004). Horizontal dotted line represents the mean and error bars indicate S.D. Statistical analysis was performed using a two-tailed unpaired *t*-test on arcsin-transformed data.



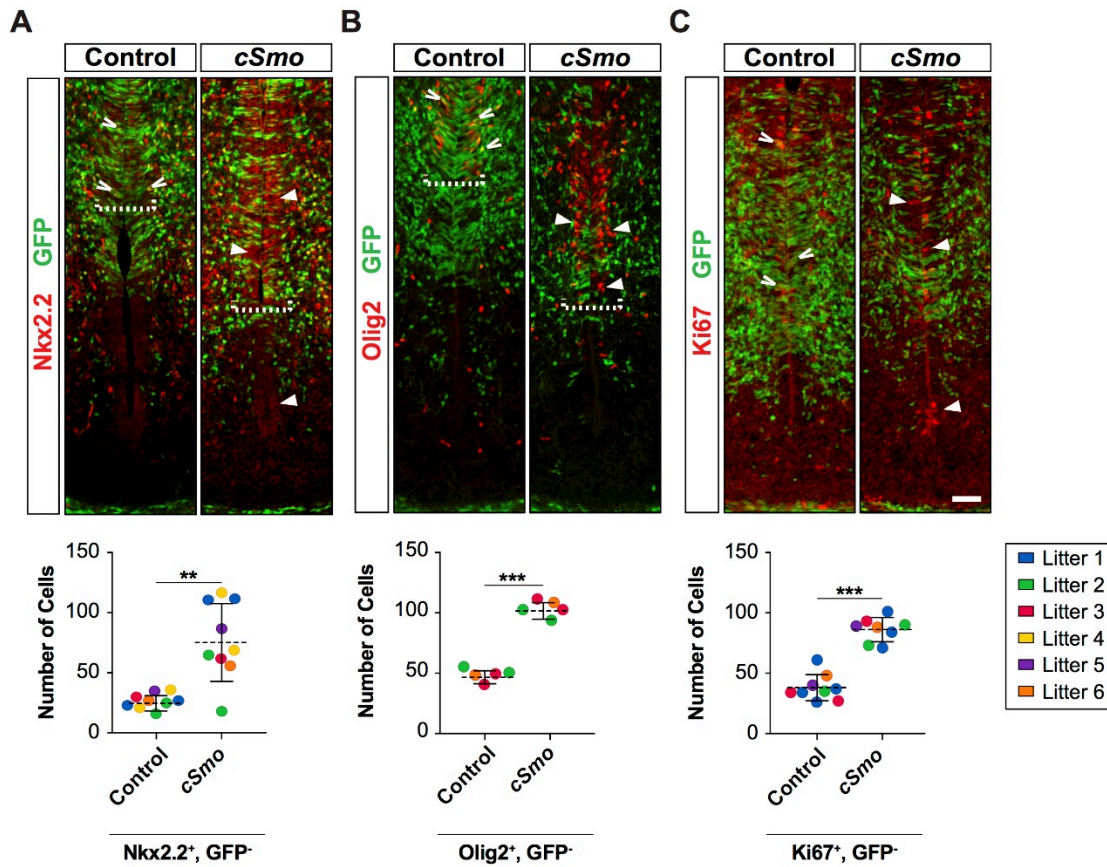

**Figure S5. *cSmo* embryos show ectopic activation of Shh responsive genes in non-recombined (wild type) cells.** Coronal sections through the tuberal hypothalamus of control and *cSmo* embryos at E14.5 (tamoxifen administered at E10.5). Shh responsive progenitors in control embryos frequently co-label with GFP and (A) Nkx2.2, (B) Olig2, or (C) Ki67 (open arrowhead). Most progenitors in *cSmo* embryos showing ectopic expression of Nkx2.2, Olig2, or Ki67 do not co-label with GFP (closed arrowheads), suggesting that they derive from non-recombined (wild type) cells. The ventral boundary of Nkx2.2 and Olig2 expression (white dotted bracket) is shifted ventrally in *cSmo* embryos. The same images are shown in Figure 6 without the GFP overlay. Scale bar: 50  $\mu$ m.
